# Supplementary material
Source: ML conference proceedings conference paper supplement (https://openreview.net/forum?id=d_2lcDh0Y9c)

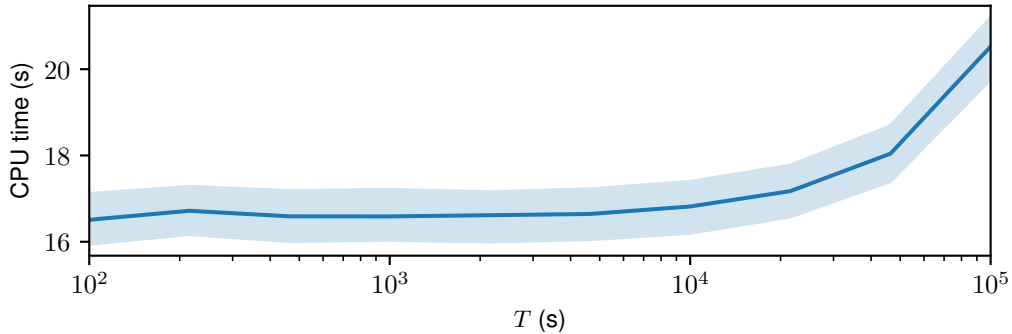

Supplement: supplementary_material [file attachment]

Atom 0

Atom 1

Atom 2

Atom 6

Spatial

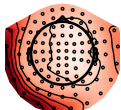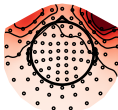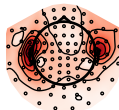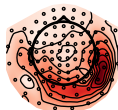

Temporal

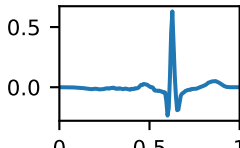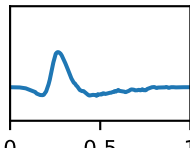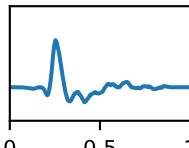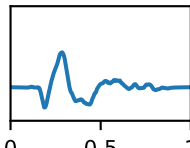

Intensity

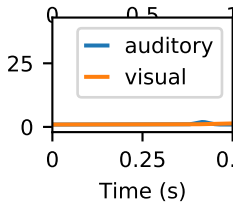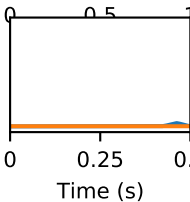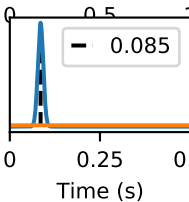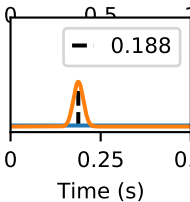

Supplement: supplementary_material [file attachment]

$$\mu = 0.8, \alpha = 0.8, m = 0.2, \sigma = 0.2$$

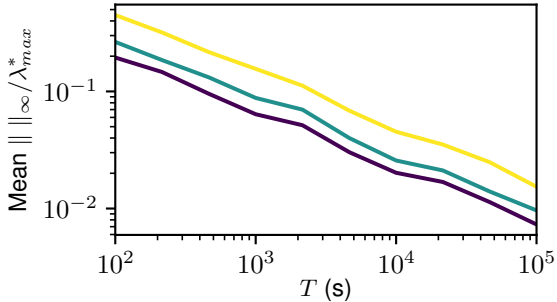

$$\mu = 0.8, \alpha = 0.8, m = 0.2, \sigma = 0.05$$

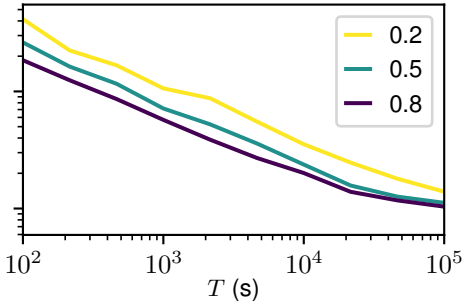

Supplement: supplementary_material [file attachment]

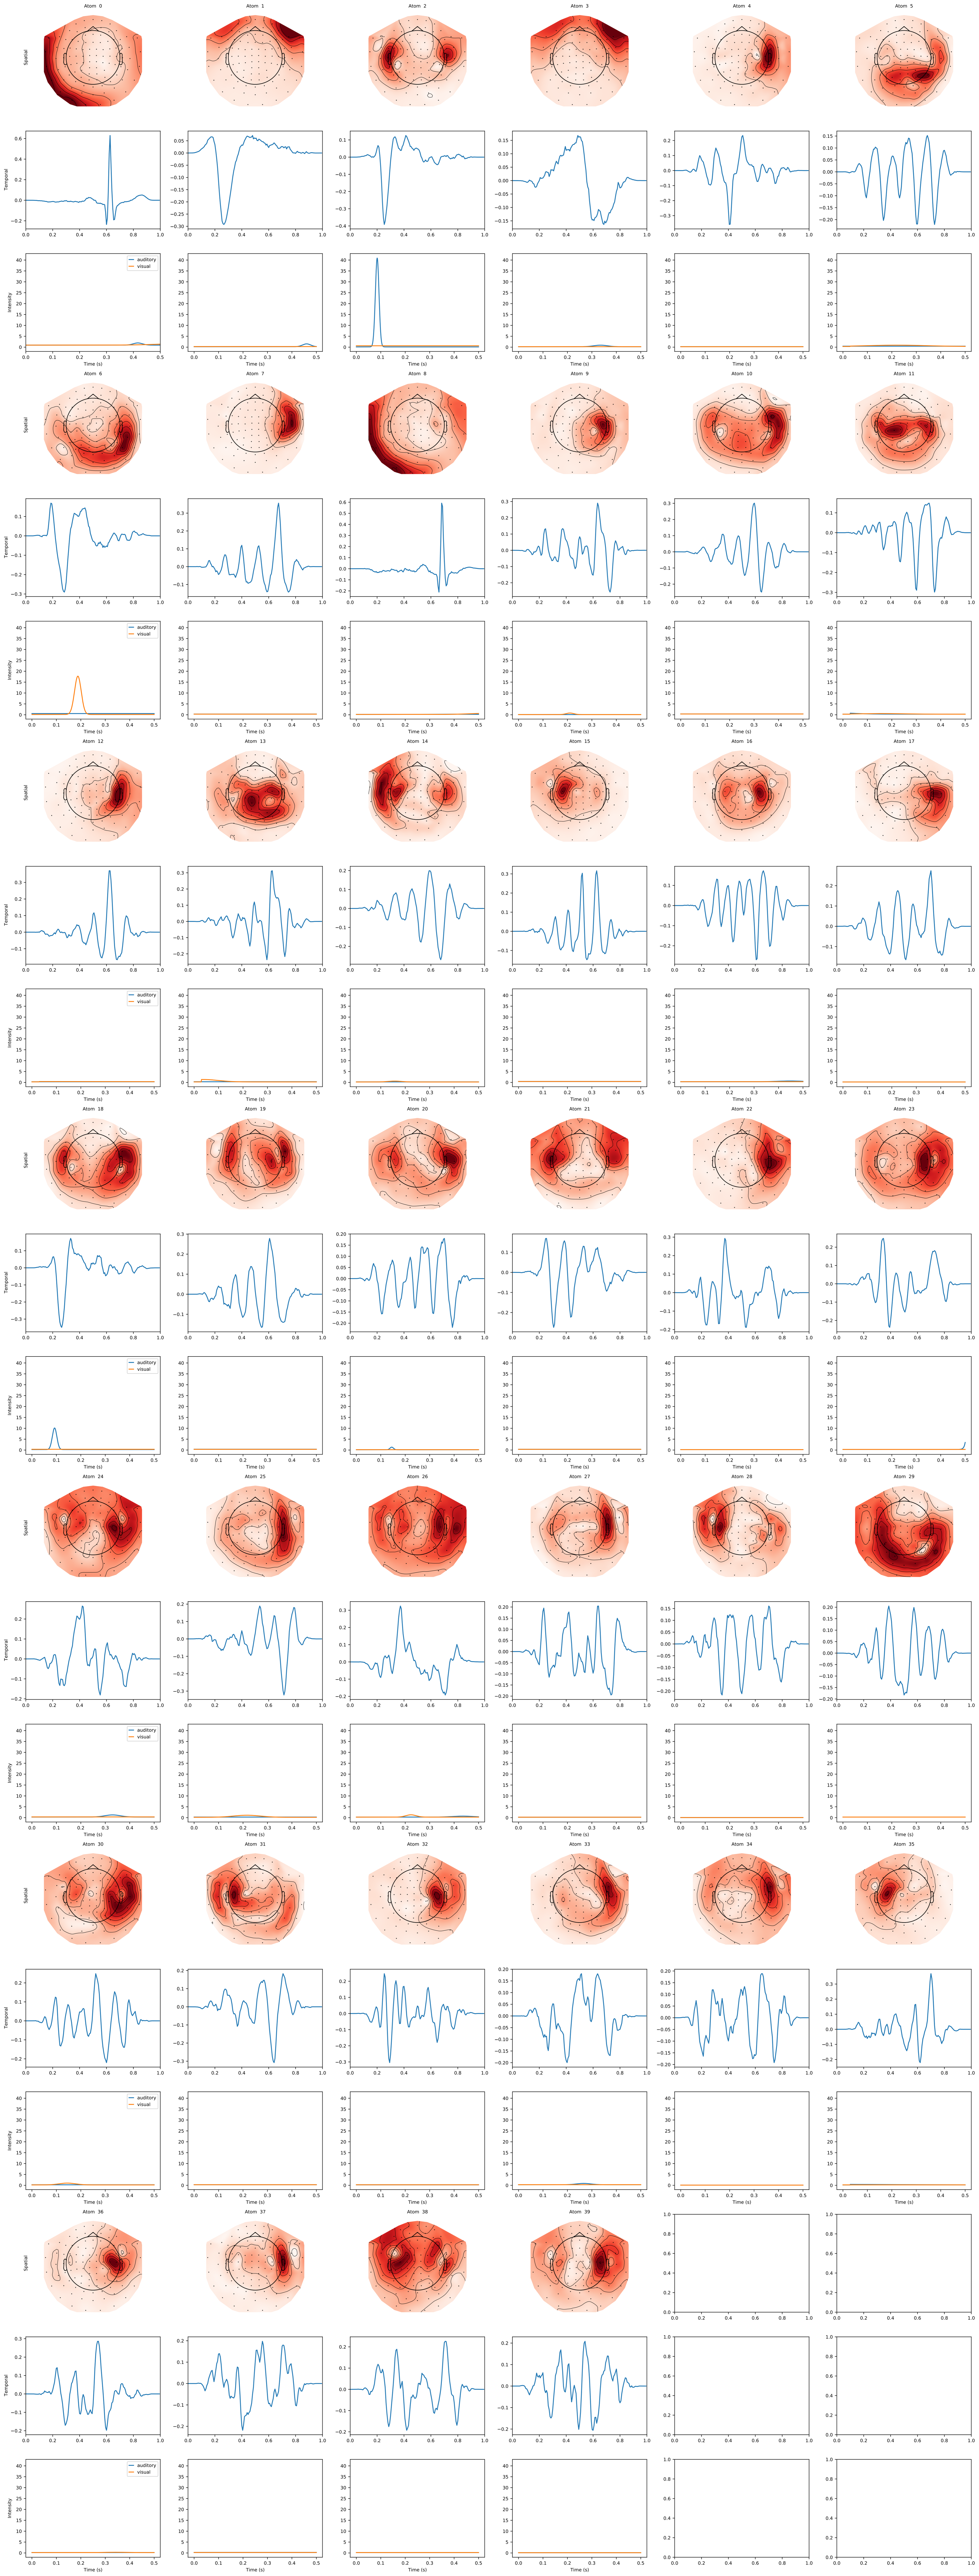

Supplement: supplementary_material [file attachment]

Spatial

Atom 1

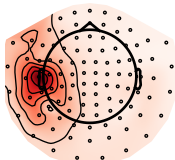

Atom 2

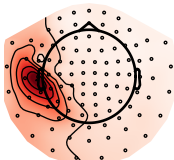

Atom 4

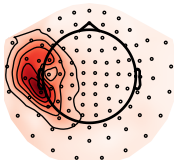

Intensity

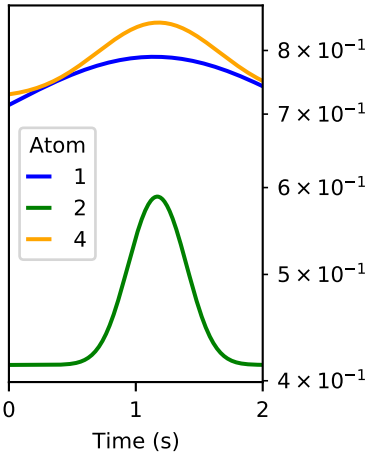

Temporal

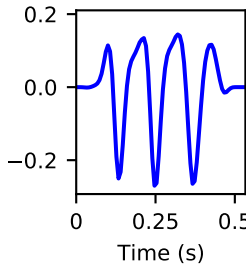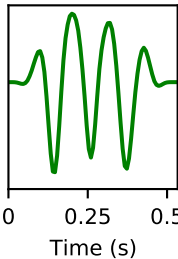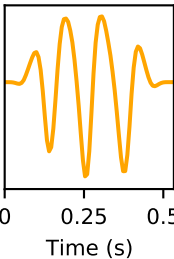

Supplement: supplementary_material [file attachment]

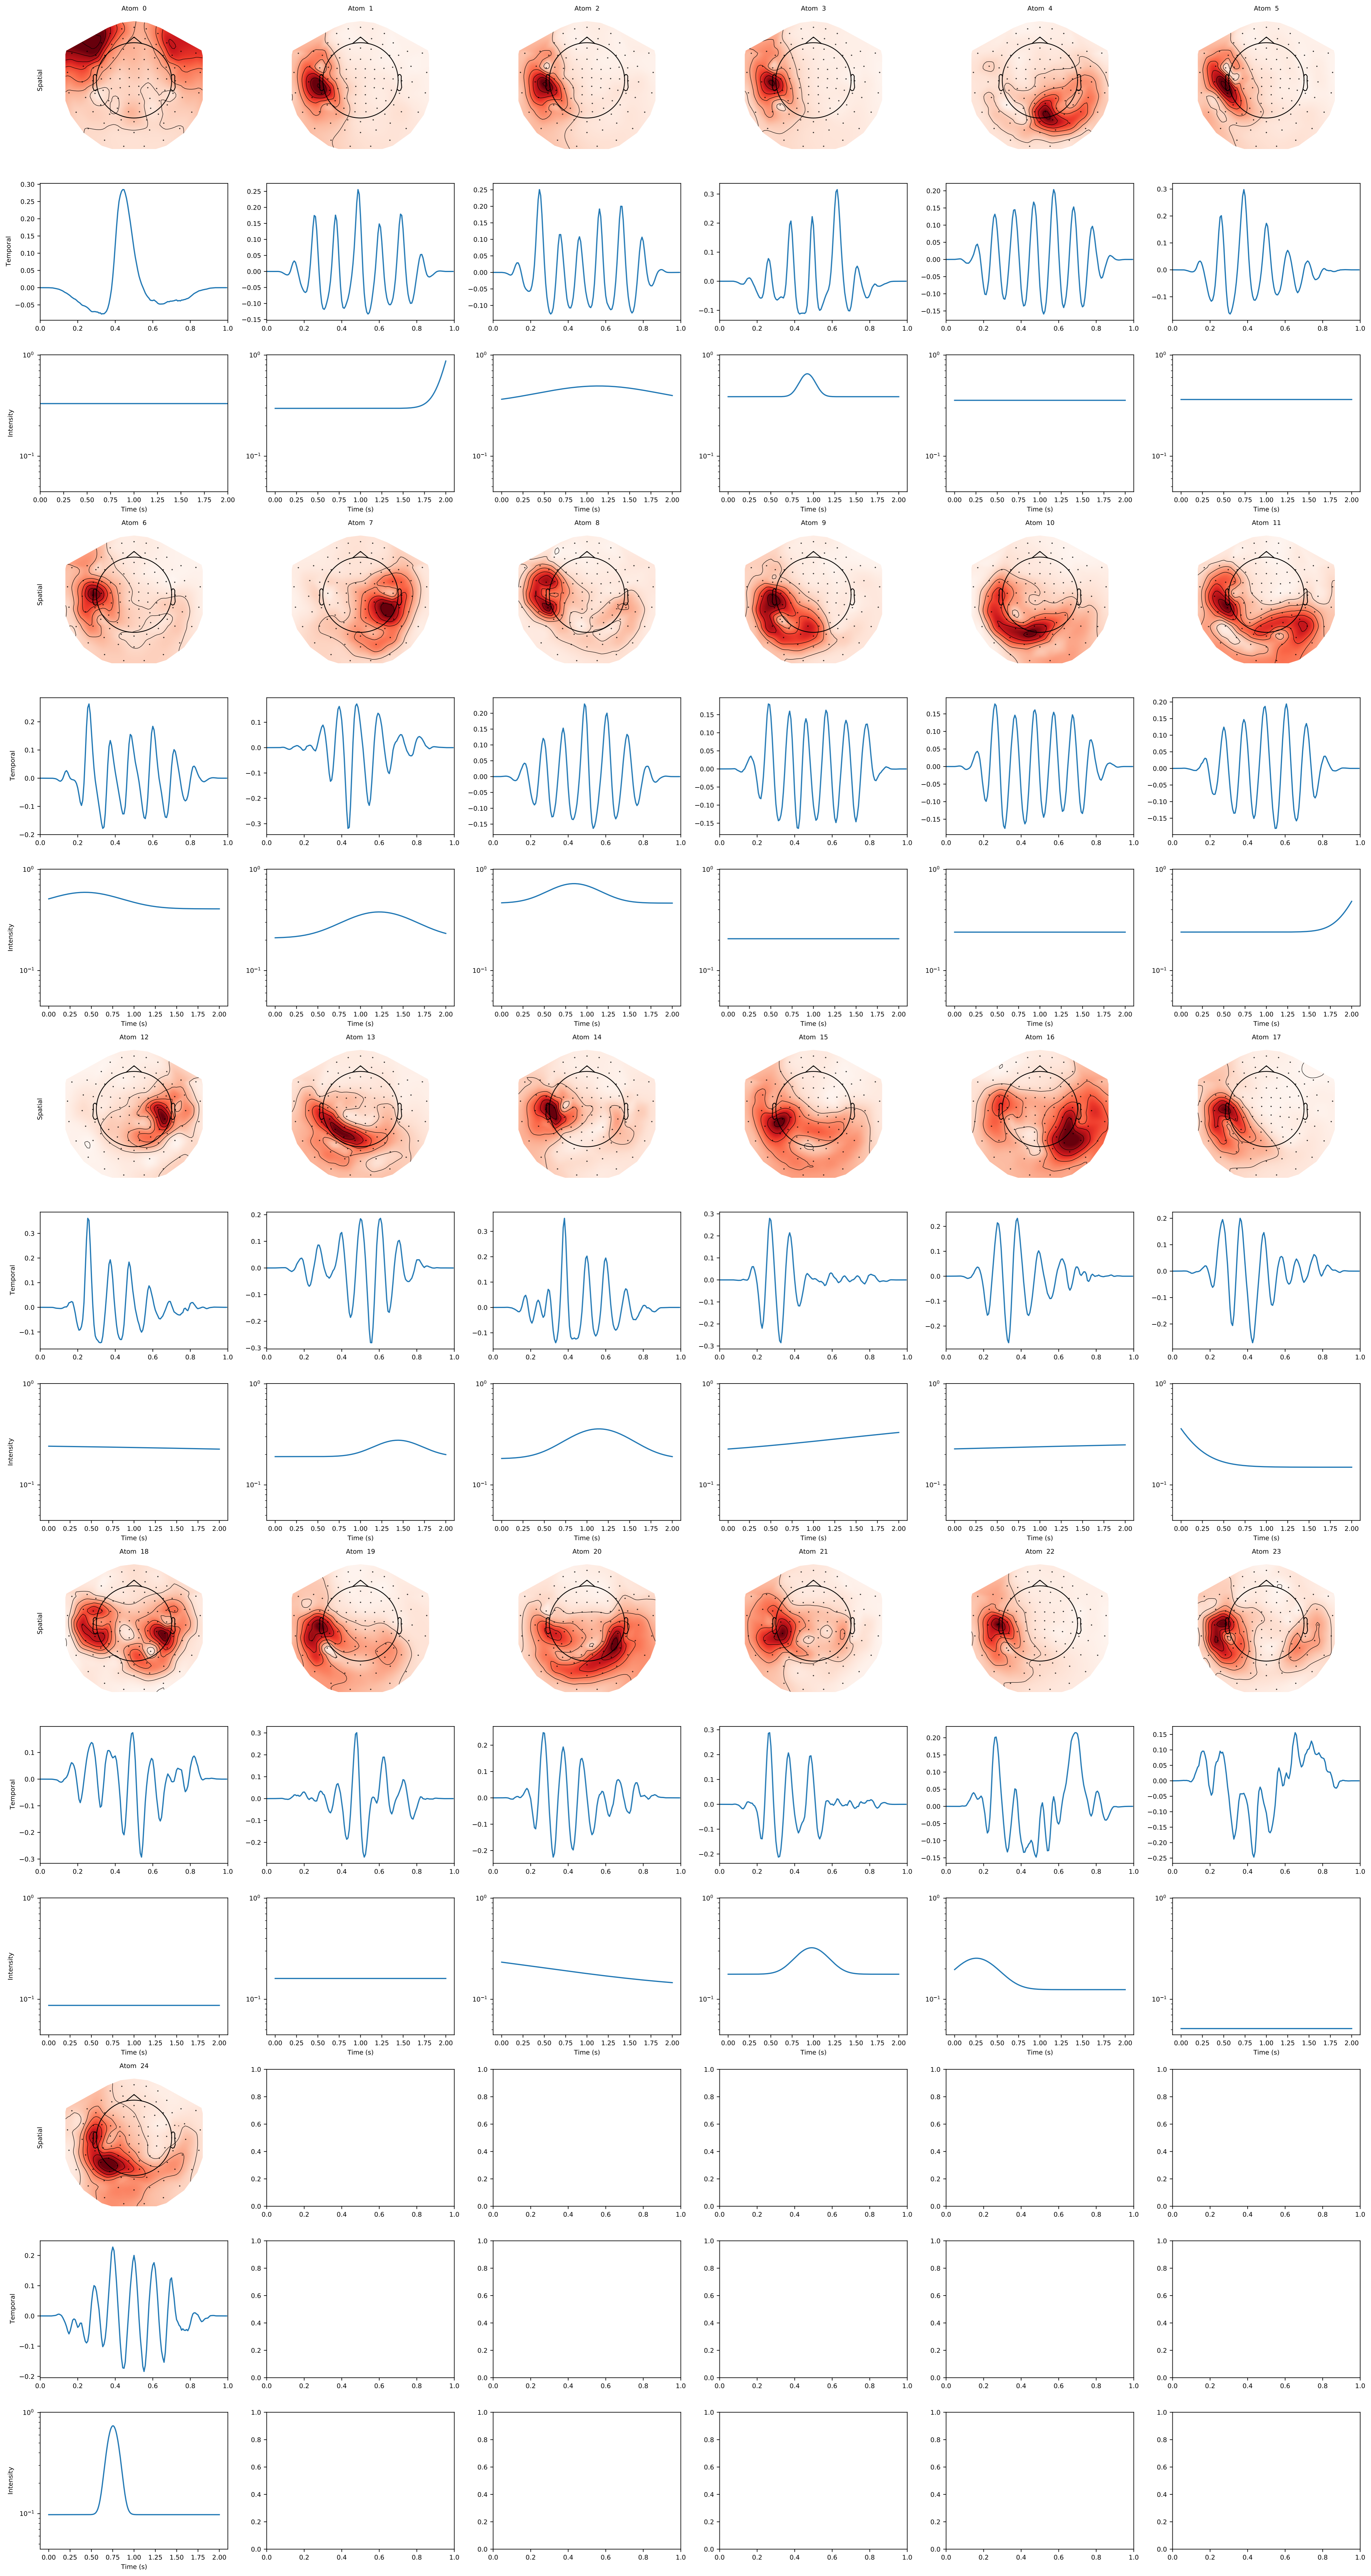

Supplement: supplementary_material [file attachment]

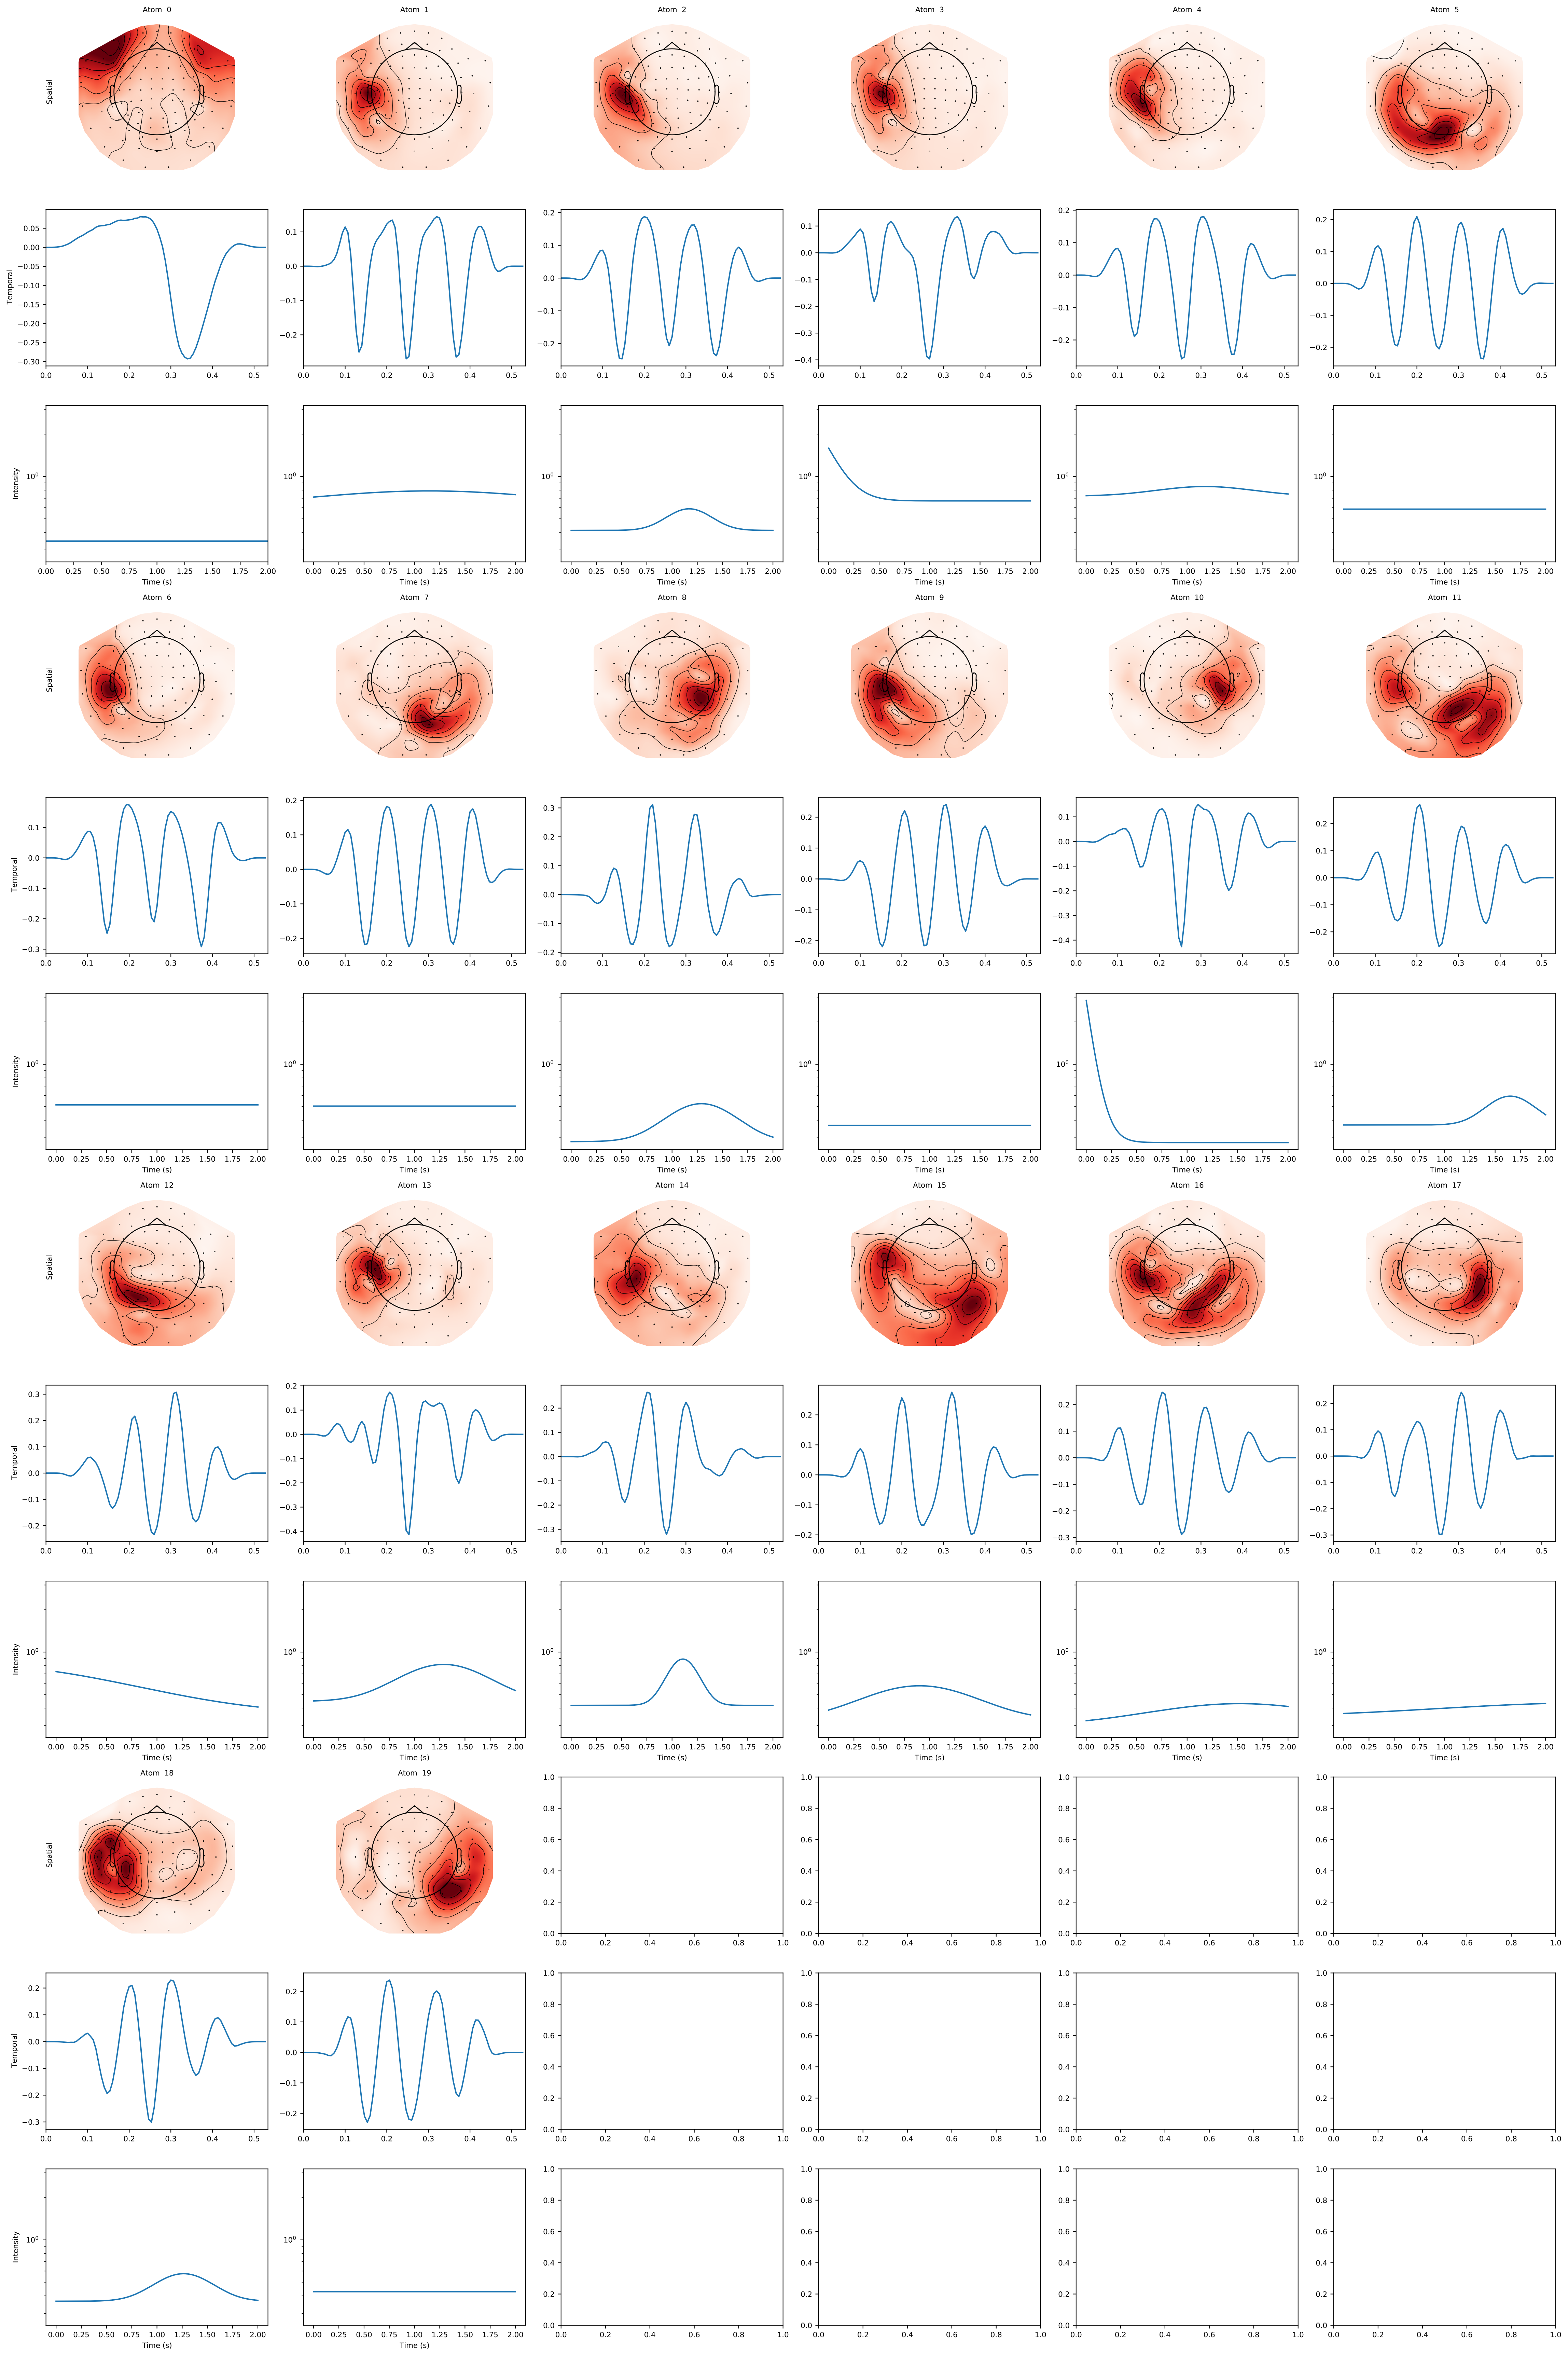

Supplement: supplementary_material [file attachment]

Atom 2

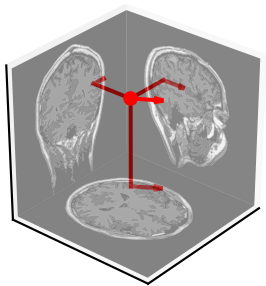

Atom 7

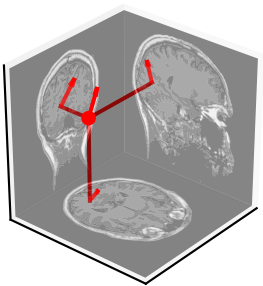

Atom 10

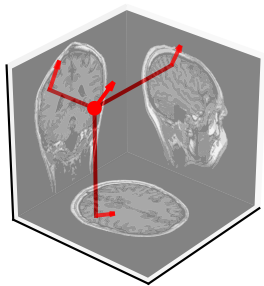

Supplement: supplementary_material [file attachment]

$\mu = 0.8, \alpha = 0.8, m = 0.2, \sigma = 0.2$

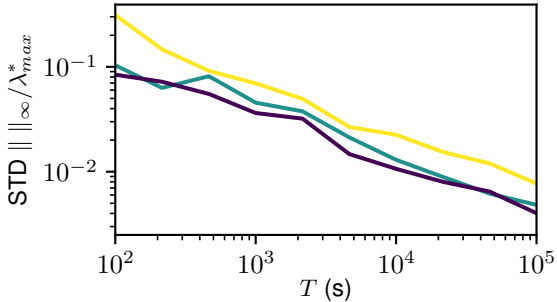

$\mu = 0.8, \alpha = 0.8, m = 0.2, \sigma = 0.05$

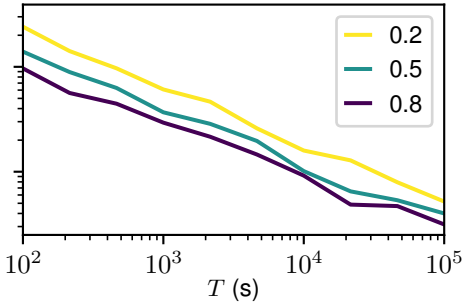

Supplement: supplementary_material [file attachment]

Atom 0

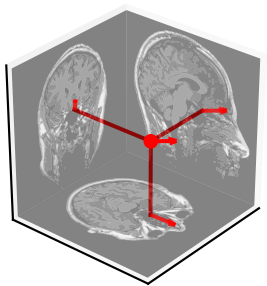

Atom 7



Atom 10



Supplement: supplementary_material [file attachment]

Atom 1

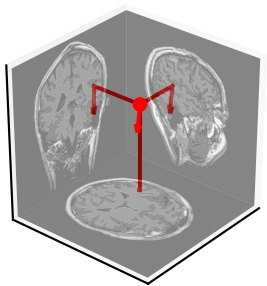

Atom 2

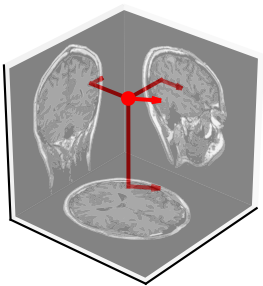

Atom 4

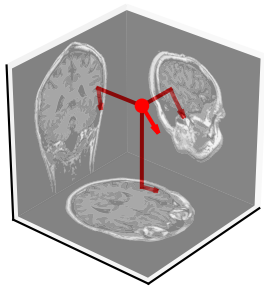

Supplement: supplementary_material [file attachment]

Spatial

Atom 2

Atom 7

Atom 10

Intensity

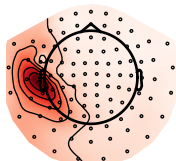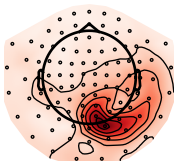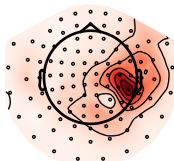

Temporal

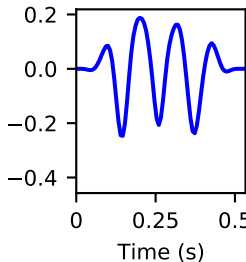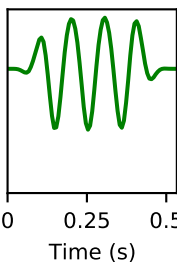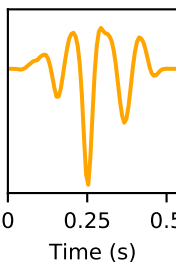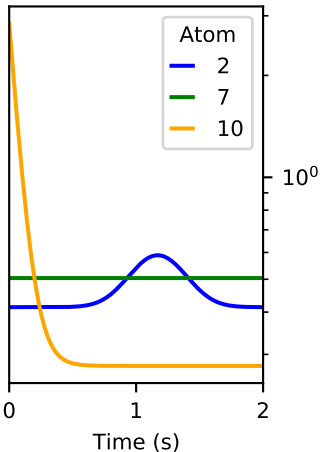

Supplement: supplementary_material [file attachment]

Spatial

Atom 0

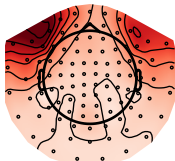

Atom 7



Atom 10



Intensity

Atom

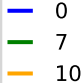

Temporal

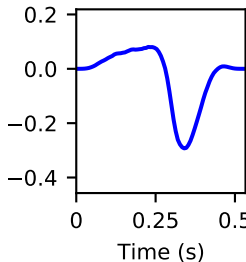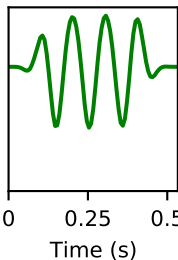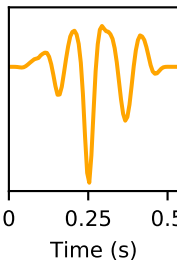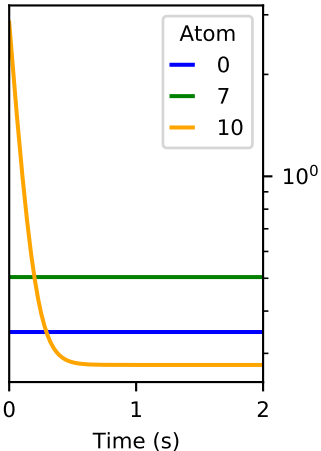

Supplement: supplementary_material [file attachment]

$\mu = 0.8, \alpha = 0.8, m = 0.2, \sigma = 0.2$

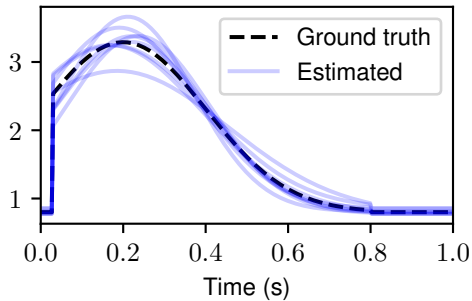

$\mu = 0.8, \alpha = 0.8, m = 0.2, \sigma = 0.05$

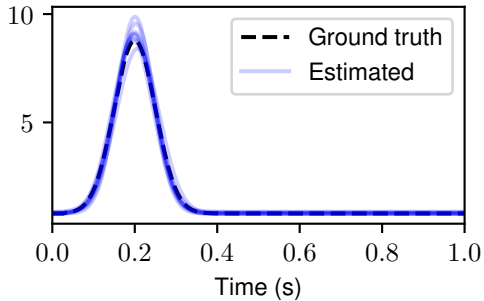

Supplement: supplementary_material [file attachment]
